# Supplementary material for: PhbZIP2 regulates photosynthesis-related genes in an intertidal macroalgae, Pyropia haitanensis, under stress
Source: Front Mol Biosci. 2024 Apr 15;11:1345585. doi: 10.3389/fmolb.2024.1345585 (PMC11056619; doi:10.3389/fmolb.2024.1345585)
Supplement: Supplementary file 1 [file Table2.XLSX]

## Sheet: Sheet1
Table S2 Abbreviated gene names of differentially expressed genes in photosynthesis and photosynthesis—antenna proteins
Differentially expressed genes	K_id desc
PSBS2	photosystem II 22kDa protein
PSBS1	photosystem II 22kDa protein
PSBR	photosystem II 10kDa protein
PSBQ	photosystem II oxygen-evolving enhancer protein 3
PSBO	photosystem II oxygen-evolving enhancer protein 1
PSB27-1	photosystem II Psb27 protein
PSAO	photosystem I subunit PsaO
PSAN	photosystem I subunit PsaN
PSAH	photosystem I subunit VI
PSAF	photosystem I subunit III
PSAE	photosystem I subunit IV
psaD	photosystem I subunit II
petF	ferredoxin
PETE	plastocyanin
OsI_012078	light-harvesting complex II chlorophyll a/b binding protein 2
LHCSR3.1	light-harvesting complex I chlorophyll a/b binding protein 1
LHCSR1	light-harvesting complex I chlorophyll a/b binding protein 1
LHCB7	light-harvesting complex II chlorophyll a/b binding protein 7
LHCA6	light-harvesting complex I chlorophyll a/b binding protein 5
LHCA5	light-harvesting complex I chlorophyll a/b binding protein 5
LHCA4	light-harvesting complex I chlorophyll a/b binding protein 4
LHCA1	light-harvesting complex I chlorophyll a/b binding protein 1
FDC2	ferredoxin
FDC1	ferredoxin
cabII-1	light-harvesting complex II chlorophyll a/b binding protein 1
CAB8	light-harvesting complex I chlorophyll a/b binding protein 3
ATPC	F-type H+-transporting ATPase subunit gamma
